# Supplementary material for: FISim: A new similarity measure between transcription factor binding sites based on the fuzzy integral
Source: PubMed Central journal article supplement (PMC2722654; doi:10.1186/1471-2105-10-224), 2009-07-20
Supplement: 1471-2105-10-224-S1.pdf [file 1471-2105-10-224-S1.pdf]

# Fuzzy Integral Similarity for TFBSs. Additional File 1. Jaspar motifs statistics

## Jaspar motifs statistics

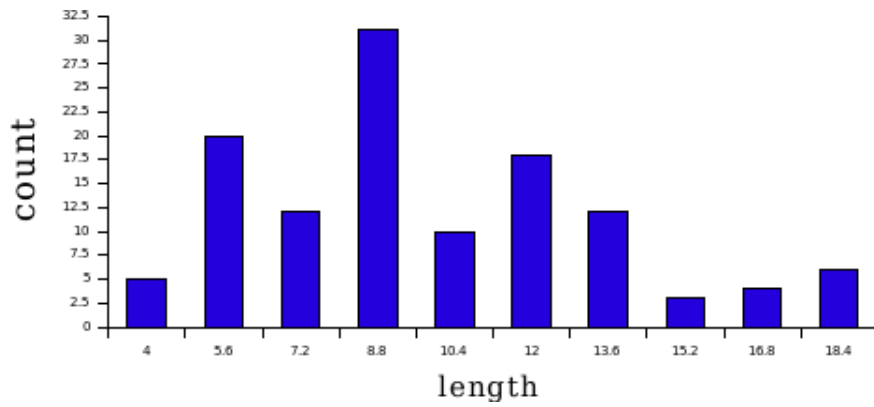

Figure 1: Jaspar motifs length distribution.

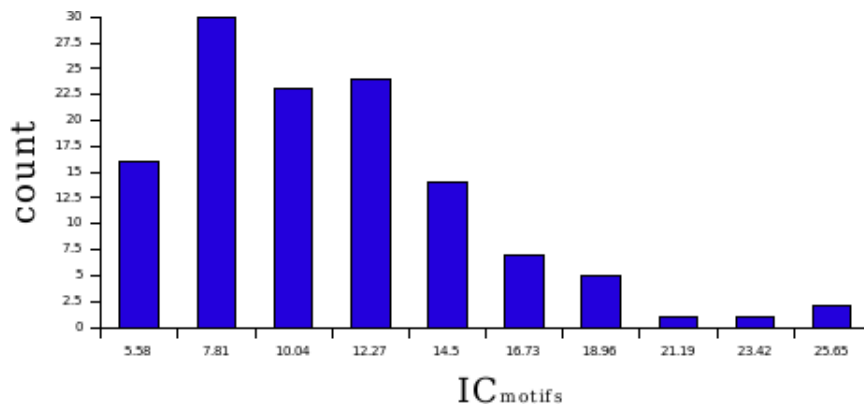

Figure 2: Jaspar motifs IC distribution.

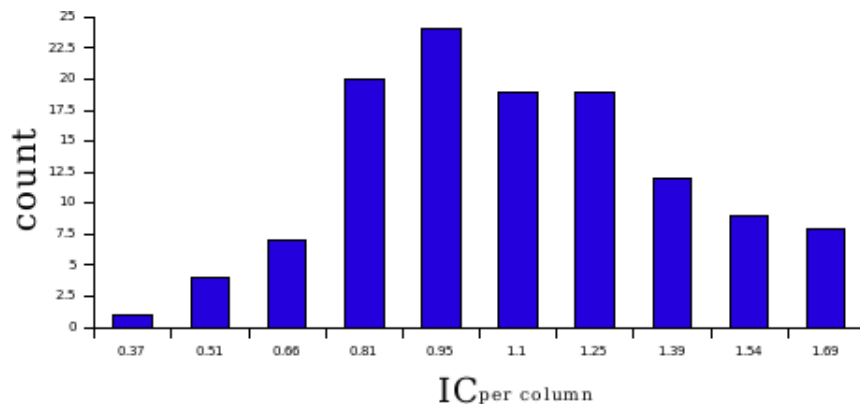

Figure 3: Jaspas motifs IC per column distribution.

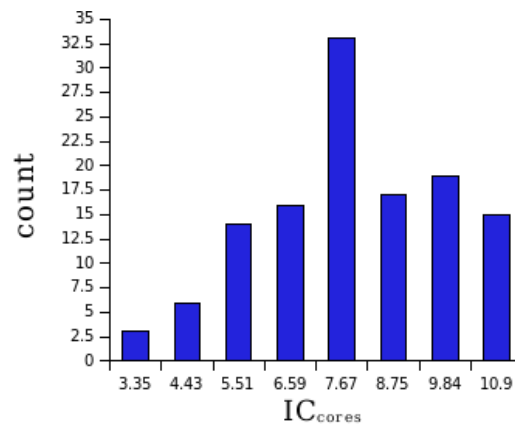

Figure 4: Jaspas cores IC distribution.
