# Supplementary material for: FISim: A new similarity measure between transcription factor binding sites based on the fuzzy integral
Source: PubMed Central journal article supplement (PMC2722654; doi:10.1186/1471-2105-10-224), 2009-07-20
Supplement: 1471-2105-10-224-S2.pdf [file 1471-2105-10-224-S2.pdf]

# Fuzzy Integral Similarity for TFBSs. Additional File 2. Related motifs experiment

## Related Motifs

In order to facilitate the visual comparison of the non-conserved positions, fraction-based logos are used.

### Reference motif

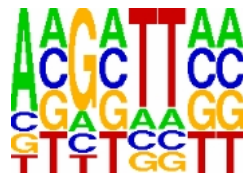

Figure 1: Logo of the motif used as reference in the experiment of related motifs.

### Seed motifs

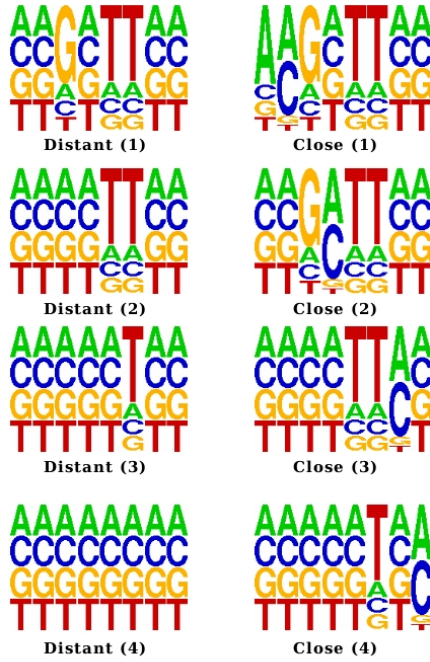

Figure 2: Pairs of seeds of related motifs. The number of the columns not shared with the reference motifs is indicated between brackets

## Area Under the Curve Scores

Table 1 shows the area under the curve (AUC) scores of the measures for the related motifs experiment. Note that the more differences between the motifs the more difficult the discrimination task is.

| # Differences | FISim | KLD   | Chi2  | ALLR  | Tomtom | Euclidean | Pape  |
|---------------|-------|-------|-------|-------|--------|-----------|-------|
| 1             | 0.785 | 0.328 | 0.242 | 0.232 | 0.894  | 0.657     | 0.701 |
| 2             | 0.785 | 0.350 | 0.282 | 0.315 | 0.795  | 0.633     | 0.430 |
| 3             | 0.783 | 0.353 | 0.291 | 0.276 | 0.697  | 0.615     | 0.590 |
| 4             | 0.682 | 0.202 | 0.157 | 0.213 | 0.573  | 0.404     | 0.632 |

Table 1: Area Under the Curve scores for the related motifs experiment.
