# Supplementary material for: FISim: A new similarity measure between transcription factor binding sites based on the fuzzy integral
Source: PubMed Central journal article supplement (PMC2722654; doi:10.1186/1471-2105-10-224), 2009-07-20
Supplement: 1471-2105-10-224-S5.pdf [file 1471-2105-10-224-S5.pdf]

# Fuzzy Integral Similarity for TFBSs. Additional File 5. Motif discovery data

## 1 Gene list

Table 1 shows the genes that belong to the cluster termed “Luminal epithelial gene cluster containing ER” in (1).

| Gene   | GenBank Acc. | Description                                           |
|--------|--------------|-------------------------------------------------------|
| GPR160 | H50224       | G protein-coupled receptor 160                        |
| ACADSB | H95792       | Acyl-Coenzyme A dehydrogenase, short/branched chain   |
| ESR1   | AA291749     | Estrogen receptor 1                                   |
| TFF3   | N74131       | Trefoil factor 3 (intestinal)                         |
| GATA3  | R31441       | GATA binding protein 3                                |
| XBP1   | W90128       | X-box binding protein 1                               |
| FOXA1  | T74639       | Forkhead box A1                                       |
| AFF3   | H99588       | AF4/FMR2 family, member 3                             |
| LIV1   | H29315       | Estrogen-regulated protein LIV-1                      |
| NPNT   | AA029948     | Nephronectin                                          |
| TUBA1C | N54508       | Tubulin, alpha 1c                                     |
| NAT1   | R91802       | N-acetyltransferase 1 (arylamine N-acetyltransferase) |
| MYO6   | AA625890     | Myosin VI                                             |
| MYO6   | AA030004     | Myosin VI                                             |

Table 1: List of 15 co-regulated genes

## 2 Retrieved motifs

In this section we show the most significant motifs obtained from the three motif discovery programs used.

### 2.1 MDSCAN

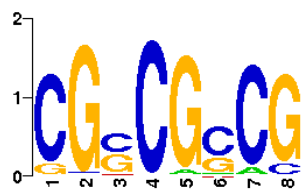

Figure 1: MDSCAN-1

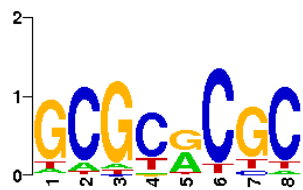

Figure 2: MDSCAN-2

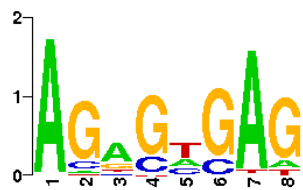

Figure 3: MDSCAN-3

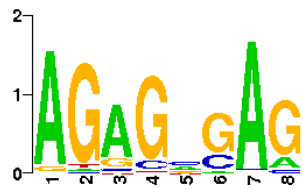

Figure 4: MDSCAN-4

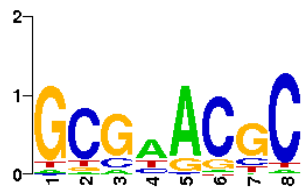

Figure 5: MDSCAN-5

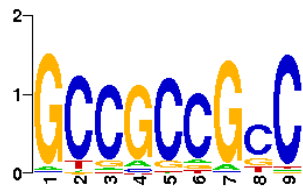

Figure 6: MDSCAN-6

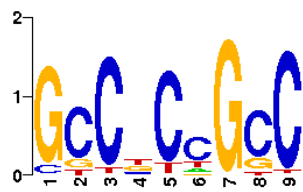

Figure 7: MDSCAN-7

## 2.2 MEME

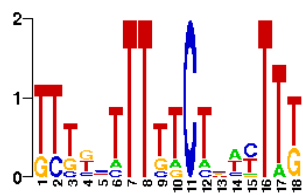

Figure 8: MEME-1



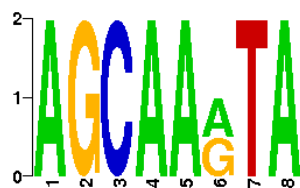

Figure 13: MEME-6

### 2.3 Weeder

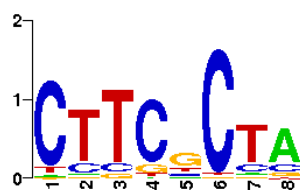

Figure 14: Weeder-1

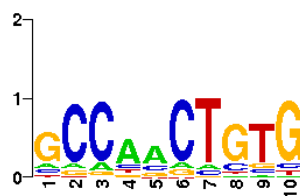

Figure 15: Weeder-2

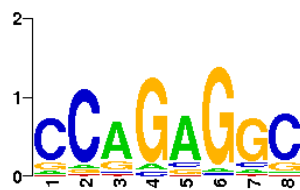

Figure 16: Weeder-3

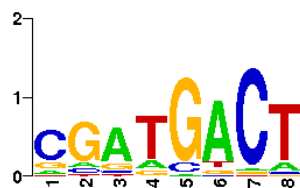

Figure 17: Weeder-4

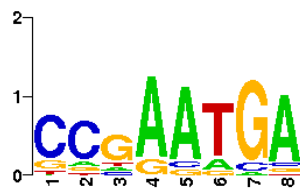

Figure 18: Weeder-5

### 3 JASPAR matches

In this section we show the best JASPAR matches for each putative motif found by each of the three motif discovery algorithms.

#### 3.1 MDSCAN

| Motif    | Best JASPAR match | FISim value |
|----------|-------------------|-------------|
| MDSCAN-1 | CREB1             | 0.745       |
| MDSCAN-2 | ABI4              | 0.700       |
| MDSCAN-3 | ESR1              | 0.731       |
| MDSCAN-4 | TP53              | 0.732       |
| MDSCAN-5 | Pax4              | 0.704       |
| MDSCAN-6 | NFKB1             | 0.743       |
| MDSCAN-7 | TFAP2A            | 0.701       |

Table 2: Best JASPAR matches for the MDSCAN algorithm

#### 3.2 MEME

| Motif  | Best JASPAR match | FISim value |
|--------|-------------------|-------------|
| MEME-1 | MNB1A             | 0.790       |
| MEME-2 | SPIB              | 0.793       |
| MEME-3 | SPI1              | 0.808       |
| MEME-4 | ZNF42             | 0.775       |
| MEME-5 | GATA2             | 0.745       |

Table 3: Best JASPAR matches for the MEME algorithm

#### 3.3 Weeder

| Motif    | Best JASPAR match | FISim value |
|----------|-------------------|-------------|
| Weeder-1 | Pax5              | 0.727       |
| Weeder-2 | TAL1-TCF3         | 0.744       |
| Weeder-3 | ESR1              | 0.682       |
| Weeder-4 | TCF11             | 0.789       |
| Weeder-5 | CREB1             | 0.701       |

Table 4: Best JASPAR matches for the Weeder algorithm

## References

- [1] Sorlie T, Perou CM, Tibshirani R, Aas T, Geisler S, Johnsen H, Hastie T, Eisen MB, van de Rijn M, Jeffrey SS, Thorsen T, Quist H, Matesec JC, Brown PO, Botstein D, Lunning PE, , Brresen-Dale A: **Gene expression patterns of breast carcinomas distinguish tumor subclasses with clinical implications.** *PNAS* 2001, **98**(19):10869–10874.
